## 1 **A multiregional assessment of transnational pathways of introduction**

2 Chris M. McGrannachan<sup>1</sup>, Shyama Pagad<sup>2</sup> and Melodie A. McGeoch<sup>3</sup>

3 <sup>1</sup>Manaaki Whenua – Landcare Research, 231 Morrin Rd, St. Johns, Auckland, 1072, New  
4 Zealand; <sup>2</sup>Invasive Species Specialist Group, Species Survival Commission, International  
5 Union for Conservation of Nature, University of Auckland, 1072 Auckland, New Zealand;  
6 <sup>3</sup>Department of Ecology, Environment and Evolution, School of Life Sciences, La Trobe  
7 University, Melbourne 3086, Australia

8 Corresponding author: *Chris M McGrannachan* (mcgrannachanc@landcareresearch.co.nz)

### 9 **Abstract**

10 Information on the pathways by which alien taxa are introduced to new regions is vital for  
11 prioritising policy and management responses to invasions. However, available datasets are  
12 often compiled using disparate methods, making comparison and collation of pathway data  
13 difficult. Using a standardised framework for recording and categorising pathway data can  
14 help to rectify this problem and provide the information necessary to develop indicators for  
15 reporting on alien introductions. We combine the Convention on Biological Diversity's  
16 Pathways Categorisation Scheme (CPC) with data compiled by the Invasive Species  
17 Specialist Group (ISSG) to report on multiregional trends on alien introduction pathways  
18 over the past 200+ years. We found a significant increase in the documented number of  
19 multiregional alien introduction events across all pathways of the CPC's three hierarchical  
20 levels. The 'escape' pathway is the most common documented pathway used by alien taxa.  
21 Transport stowaways via shipping-related vectors are a rapidly increasing contribution to  
22 alien introductions. Most alien introduction events were of unknown pathway origin,  
23 highlighting the challenge of information gaps in pathway data and reiterating the need for  
24 standardised information-gathering practices. Combining the CPC framework with alien

25 introduction pathways data will standardise pathway information and facilitate the  
26 development of global indicators of trends in alien introductions and the pathways they use.  
27 These indicators have the potential to inform policy and management strategies for  
28 preventing future biological invasions and can be downscaled to national and regional levels  
29 that are applicable across taxa and ecosystems.

30 Keywords: Aichi Target 9, alien taxa, Convention on Biological Diversity, introduction event,  
31 introduction pathway, propagule pressure

32

### 33 **Introduction**

34 Expansion and increased intensity of global trade and human movement has exacerbated  
35 global species invasions (Essl et al. 2015, Early et al. 2016). Worldwide increases in the  
36 number of alien species are likely to continue (Seebens et al. 2017), meaning it is crucial that  
37 the pathways by which alien species are transported and introduced to new locations, and  
38 how these change in relative importance over time, are identified, understood and better  
39 managed (Essl et al. 2015, Chapman et al. 2017). Pathways of introduction are the means by  
40 which alien species are transported intentionally or unintentionally outside of their natural  
41 geographic range (Richardson et al. 2010, Turbelin et al. 2017). A pathway approach to risk  
42 assessment for invasive alien species focuses primarily on identifying introduction pathways  
43 to (i) develop early detection and preventative strategies, with the aim to reduce or eliminate  
44 the propagule pressure of alien species (Faulkner et al. 2016, Padayachee et al. 2017, Pergl et  
45 al. 2017), and (ii) to prioritise investment in managing pathways responsible for the highest  
46 propagule loads or particular high risk species (McGeoch et al. 2016). This approach is  
47 particularly important in the absence of species-specific data, or when suitable control efforts  
48 for individual species are unachievable (Hulme et al. 2008, Padayachee et al. 2017).  
49 Accounting for introduction pathways is therefore fundamental for developing relevant  
50 management and policy strategies that minimise the introduction, spread and impact of alien  
51 species (Hulme et al. 2008).

52       Efforts to categorize alien species via their pathways of introduction have culminated  
53 in the development of a standardised pathway categorisation framework (Harrower et al.  
54 2017). Using this framework, pathways of introduction and spread are classified as  
55 intentional or unintentional and encompass three introduction mechanisms: the importation of  
56 a commodity, the arrival via a transport vector (through a dispersal corridor resulting from  
57 human activity), and the natural spread from a neighbouring region where the species is alien

58 (UNEP 2014, Essl et al. 2015). The foundation of this framework is the six pathway  
59 introduction categories (release, escape, transport-contaminant, transport-stowaway, corridor  
60 and unaided) originally proposed by Hulme et al. (2008), which encompass 32 specific  
61 vectors of introduction (for example, agriculture, horticulture and ship ballast water). This  
62 ‘Convention on Biological Diversity (CBD) Pathways Categorisation’ (CPC) (*sensu*  
63 Harrower et al. 2017) incorporates standardised terminology and guidelines for pathway  
64 categorization and is applicable at a global scale and across different taxonomic groups  
65 (Harrower et al. 2017, Tsiamis et al. 2017). The CPC has now been validated by application  
66 to alien introductions at national (South Africa; Faulkner et al. 2016), continental (Europe;  
67 Pergl et al. 2017, Tsiamis et al. 2017) and global scales (167 cities worldwide; Padayachee et  
68 al. 2017). Importantly, the intention of this scheme is, *inter alia*, to assist global reporting as  
69 well as country Parties to the CBD to respond to the Strategic Plan for Biodiversity 2011-  
70 2020 (UNEP 2014). In particular, this is relevant to achieve and report on Aichi Target 9 by  
71 2020, such that *invasive alien species and pathways are identified and prioritized, priority*  
72 *species are controlled or eradicated and measures are in place to manage pathways to*  
73 *prevent their introduction and establishment* (Convention on Biological Diversity 2010).  
74 Whereas monitoring pathways of invasion was not included in the previous global indicator  
75 framework for invasive alien species (McGeoch et al. 2010), doing so has now become  
76 central to reporting on policy targets for biological invasion (McGeoch and Jetz 2019).

77         Developing information on pathways introductions using a standardised framework is  
78 currently a priority for several reasons. First, preventing the introduction and spread of alien  
79 and potentially invasive species is the first line of defence in the management of biological  
80 invasions. Managing the early stages of the invasion process (i.e. transport and introduction)  
81 that focus on prevention is more cost-effective than reactive, post-introduction management  
82 of species (Leung et al. 2002, Rout et al. 2011, Kumschick and Richardson 2013).

83 Nonetheless, management, policy and research that targets the transport and introduction  
84 stages of invasion remain relatively underrepresented compared to the invasion stages of  
85 establishment and spread (Puth and Post 2005, Early et al. 2016, Chapman et al. 2017).

86 Second, information on the pathways of species introductions has not, to date, been  
87 consolidated into a readily available or accessible form (Saul et al. 2017). Harmonising and  
88 identifying discrepancies between data sources is crucial for informing alien species policy  
89 and management (Seebens et al. 2020). For example, a recent comparison of European  
90 pathway data between the European Alien Species Information Network (EASIN) and the  
91 CPC revealed that the pathway subcategories of ~ 5,500 alien species registered with EASIN  
92 did not directly align with CPC subcategories (Tsiamis et al. 2017). These types of  
93 discrepancies can compound the already high level of uncertainty when identifying and  
94 assigning pathways to individual species introductions, particularly for unintentional  
95 pathways (e.g. transport-contaminant; transport-stowaway) that may be inadequately  
96 documented (Essl et al. 2015).

97 Third, information on introduction pathways contributes directly to biosecurity policy  
98 and regulations, including regulating the criteria for the import and trade of alien species  
99 (Burgiel et al. 2006, Leung et al. 2014, Hulme 2015). For example, a blacklist (banned from  
100 importation) or whitelist (permitted importation) approach has been adopted by many  
101 countries as a response to the global trade in ornamental nursery stock, which is the primary  
102 means of introduction of alien plants (Dehnen-Schmutz 2011, Essl et al. 2011, Hulme et al.  
103 2017). Pathway information informs prioritisation of biosecurity interventions by identifying  
104 pathways that pose relatively high invasion risk in terms of both propagule load (Brockerhoff  
105 et al. 2014) and high risk species (Pergl et al. 2017, Roy et al. 2014) and further informing the  
106 development of preventative management strategies and policy at multiple scales (Pyšek et  
107 al. 2011, Faulkner et al. 2016). However, few comprehensive pathway-focused policies have

108 been implemented at any administration level, and those that are in place tend to target the  
109 release and escape pathways (Essl et al. 2015).

110 Finally, information on pathway changes over time can, with appropriate modelling  
111 and interpretation (McGeoch and Jetz 2019), be used to develop indicators for reporting on  
112 alien introduction trends (Rabitsch et al. 2016, Wilson et al. 2018). While the importance of  
113 some pathways can remain constant over several decades (e.g. shipping), other pathways (e.g.  
114 horticulture) may increase in importance (Ojaveer et al. 2017, Zieritz et al. 2017). These  
115 changes may reflect updated legislation for the importation of species, or the increasing  
116 global trade of certain commodities (Zieritz et al. 2017, Seebens et al. 2018), and are  
117 important for monitoring the effectiveness of biosecurity policy and implementation, such as  
118 Aichi Biodiversity Target 9 as well as Sustainable Development Goal 15.8 (Rabitsch et al.  
119 2016).

120 To date, pathway analysis has been conducted for specific regions (e.g. South Africa,  
121 Europe; Faulkner et al. 2016, Pergl et al. 2017), environments (e.g. urban; Padayachee et al.  
122 2017), taxonomic groups (e.g. invertebrates, plant pests; Chapman et al. 2016, Houghton et  
123 al. 2016) or specific pathway(s) (Kumschick et al. 2016, Tingley et al. 2018). Although  
124 several assessments have shown changes in pathways of invasion over time (Rabitsch et al.  
125 2013, Ojaveer et al. 2017, Zieritz et al. 2017), these are restricted to specific taxonomic  
126 groups or geographic locations (but see Rabitsch et al. 2016). Building on these regional and  
127 taxon-specific efforts, here we conduct a cross-taxonomic, multiregional analysis of  
128 information available on transnational introduction pathways, that incorporates all major  
129 groups, environments and pathways, to quantify decadal trends in invasion reported via these  
130 pathways since 1800. We use a hierarchical, standard categorisation of pathways (Harrower  
131 et al. 2017) so that the results may in future be appropriately modelled, compared,  
132 downscaled to regions and countries, and form a baseline for future reporting of trends in

133 invasion pathways. We specifically ask (1) are recorded invasive alien species introductions  
134 largely intentional or unintentional? (2) What pathways of introduction and spread are  
135 responsible for alien species introductions? (3) What vectors are alien species using to move  
136 about?

## 137 **Methods**

### 138 **Data used**

139 Introduction records compiled from the Global Register of Introduced and Invasive Species  
140 (GRIIS) by the ISSG were used as the underlying data for the analysis of pathway trends. The  
141 GRIIS dataset provides verified and annotated country checklists of alien and invasive  
142 species (Pagad et al. 2018). In addition to species names, each record includes taxonomy, the  
143 environment/system in which the species occurs, the provenance/origin of the species,  
144 evidence of impact (yes/no), date of introduction or first record, type of introduction,  
145 pathways of introduction, mechanism of impact, and references for source information.  
146 GRIIS Version 2016.2 includes draft checklists for all 196 countries that are party to the  
147 CBD.

148 Data for 18746 introduction events, involving 4832 alien species in 101 countries, and  
149 occurring between the years 1300 and 2017, were available and adequate to conduct a  
150 pathways assessment (Fig. 1 – map). Here we define an introduction event as a recorded  
151 introduction of an alien species in a country outside of its native range. Each introduction  
152 event included the date of first introduction or first record of a species and contained data on  
153 either all or some of the following information types: (1) introduction being intentional or  
154 unintentional (i.e. ‘pathway type’); (2) ‘pathway category’ (escape, release, transport as  
155 contaminant or stowaway, corridors, unaided or unknown); (3) vectors (further details of  
156 specific vectors within each pathway category, (i.e. ‘pathway subcategory’). The data include

157 Animalia, Bacteria, Chromista, Fungi, Plantae, Protozoa and Virus taxa. The 101 countries  
158 cover six regions: Africa, Asia, Europe, North America, Oceania and South America (Figure  
159 2; Table S1). These countries encompass a range of different sizes, development status and  
160 climatic regions and thus are geographically representative of global data.

161 A further 5113 species are known to be introduced to the selected 101 countries via  
162 known pathways but were not included in analysis as they do not have authoritative  
163 information on dates of introduction or first record. These species were therefore excluded  
164 and we concentrated on the 4832 species for which the date of introduction in these 101  
165 countries is known. The total number of introduction events currently estimated is ~ 98422,  
166 involving ~ 10800 species (including the 5113 species mentioned above). These events,  
167 besides known invasive species, include weeds, agricultural pests and diseases, and other  
168 non-invasive aliens for which no pathway information or dates of introduction are known.

169 Information and data on pathways of introduction were extracted during 2016/2017  
170 from sources used to compile national checklists (see Pagad et al. 2018 for information on the  
171 general data collation and entry process). Information sources ranged from scientific peer-  
172 reviewed literature, databases, reports both published and unpublished and research data.  
173 Textual information describing pathways of introduction were documented and then reviewed  
174 for categorisation. These categories were inserted into the data collection templates. Because  
175 the CPC is relatively new, some of the information from the data sources used pathway  
176 terminology that did not fully align with the CBD framework. In these cases, it was necessary  
177 to interpret the pathways within the CBD framework, using literature-based pathway  
178 information as a guide. This enabled all data to be compiled using the standard categorisation  
179 of pathways endorsed by the Parties to the CBD (UNEP 2014). These categories were  
180 inserted into the data collection templates.



181 Information on dates of introduction or first record and information related to the  
182 three levels of the pathway hierarchy for the actual introduction event were recorded -  
183 pathway type, pathway category and pathway subcategory. Each introduction event was  
184 temporally classified using centuries and decades as classifiers (Appendix S1). First  
185 introduction records were aggregated by decade beyond 1800. Decadal scales are appropriate  
186 because there is often a lag between detection and reporting events. All records prior to 1800  
187 were aggregated as 'Pre-1800'. Records from the most recent decade were classified as '2011  
188 plus'.

### 189 **Pathway categorisation**

190 We used the definitions and descriptions of introduction pathways contained in Harrower et  
191 al. (2017). This document is the most up-to-date guideline for interpreting the definitions of  
192 the CPC and provides examples of the CBD Pathways Categorisation's application to species  
193 information (Harrower et al. 2017). The definitions and descriptions were revised and  
194 modified by a panel of experts, using comparisons of the CPC pathway descriptions to  
195 descriptions used in (1) the Global Invasive Species Database (GISD), (2) the Delivering  
196 Alien Invasive Species Inventories for Europe (DAISIE) database, (3) the Great Britain's  
197 Non-Native Species Information Portal (GBNNSIP) database, and (4) the EASIN information  
198 platform (Harrower et al. 2017). Of particular benefit is the distinction between pathway  
199 subcategories that appear to overlap. For example, the 'Contaminant on Plants' subcategory  
200 seemingly overlaps with the 'Contaminant nursery material' and 'Transportation of habitat  
201 material' subcategories. The Harrower et al. (2017) guideline defines and describes the  
202 difference between these pathways and treats them in a prescribed order of precedence for  
203 category allocation. For example, the 'Contaminant on plants' subcategory is defined to  
204 contain all contaminants on plants that are not related to the nursery trade, where  
205 'Contaminated nursery material' is given precedence over 'Contaminant on plants' (Harrower

206 et al. 2017). Despite some shortcomings of the CPC framework, particularly the uncertainty  
207 involved in interpreting some subcategories (Faulkner et al. 2020, Pergl et al. 2020), it is a  
208 reliable framework with which to report on introduction trends at a transnational level. The  
209 CPC framework is still relatively new (2014) and its further development and adoption will  
210 facilitate its use as a standardised tool for reporting on alien introductions (Pergl et al. 2020).

211

212

213

## 214 **Analysis of trends**

215 For pathway types (i.e. intentional or unintentional introductions), we report trends in terms  
216 of both total recorded introduction events for each decade, as well as cumulative introduction  
217 events documented between 1800 and 2017. Pathway categories are reported as total number  
218 of introduction events per decade for each category. We also report cumulative introduction  
219 events for pathway categories, using 1970 as a baseline year. This date was chosen for its  
220 comparability with the 1970 baseline used for CBD global biodiversity indicators in Butchart  
221 et al. (2010). The dominant pathway subcategories are reported as cumulative introduction  
222 events from 1800 to 2017.

223 We used generalized linear models (negative binomial distribution with log link  
224 function) to quantify changes in the recorded number of introduction events over time  
225 (introduction events ~ decade). This was conducted at all introduction pathway levels  
226 (pathway type, pathway category, pathway subcategory). For subcategories, only the  
227 pathways with more than 100 introduction events (n = 18 subcategories) were considered.

## 228 **Results**

### 229 **Pathway types**

230 There was a total of 8172 (43.59%) intentional and 10574 (56.41%) unintentional  
231 documented introduction events of alien species across the 101 countries (Table 1). Since  
232 1800, steady and significant increases in both documented intentional and unintentional  
233 introduction events have occurred (Table 2; Figure 3a, b). From 1800 to 1900, both pathway  
234 types showed similar cumulative increases in introduction events, but with more documented  
235 intentional introduction events than unintentional events (Figure 3b, Table 3). Post 1900, the  
236 overall number of documented unintentional introductions per decade was higher than  
237 intentional introductions (Figure 3a, b; Table 3). Decadal increases in documented  
238 introduction events ranged between 5.79 % (1800 – 1810) and 23.15 % (1860 – 1870) for  
239 intentional introductions and between 7.19 % (1800 – 1810) and 24.68 % (1890 – 1900) for  
240 unintentional introductions (Table 3). The average decadal increase in intentional and  
241 unintentional introductions was 13.12 % and 15.29 %, respectively (Table 3). The decade of  
242 1991 – 2000 had more documented introduction events than any other decade in the time  
243 series (Figure 3a).

#### 244 **Pathway categories**

245 The documented number of introduction events for each pathway category has increased  
246 significantly per decade since 1800 (Table 2; Figure 4a). The ‘escape’ pathway is the most  
247 prevalent pathway by which species introductions are known to occur (37.84 %), followed by  
248 ‘unknown’ pathway introductions (32.19 %; Table 1; Figure 4a). Post 1970 trends show both  
249 escape and unknown pathways increased dramatically in cumulative number of introduction  
250 events, with 3177 and 2350 additional events, respectively, occurring between 1970 and 2017  
251 (Figure 4b). This is equivalent to 81.38 % (escape) and 58.14 % (unknown) of the total  
252 number of pre-1970 documented introduction events. The remaining five pathway categories  
253 had fewer cumulative introduction events compared to escape and unknown pathways, the  
254 highest being ‘transport-contaminant’ (1982 events by 2017) and the lowest ‘unaided’ (148

255 events by 2017; Figure 4c). Of these five pathways, ‘transport-stowaway’ showed the  
256 steepest cumulative increase in introduction events post 1970 (Figure 4c).

### 257 **Pathway subcategories**

258 The 18 pathway subcategories with more than 100 introduction events since 1800 ranged  
259 from 109 to 7203 records (Table 1). The top 18 subcategories were representative of all  
260 pathway categories. ‘Unknown’ was the pathway subcategory associated with most  
261 documented introduction events (7203; 38.42 %), followed by three subcategories from the  
262 escape pathway: ‘horticulture’ (3581; 19.10 %), ‘agriculture’ (1193; 6.36 %) and  
263 ‘aquaculture/mariculture’ (1010; 5.39 %; Table 1; Figure 5a). Many of the subcategories  
264 showed sharp rates of increase, particularly from the beginning of the twentieth century,  
265 including ‘hitchhikers on ships’, ‘ship ballast water’, ‘ship hull fouling’ and ‘interconnected  
266 waterways’ (Figure 5b, c; Figure S1a). In comparison, most subcategories from the escape  
267 pathway (except horticulture) had slower cumulative introduction rates, including  
268 ‘agriculture’, ‘aquaculture/mariculture’, ‘forestry’, ‘ornamental purpose other than  
269 horticulture’ and ‘pet/aquarium species’. All but one subcategory (‘release in nature for use’)  
270 significantly increased in introduction events per decade since 1800 (Table 3).

### 271 **Discussion**

272 We used the CBD pathways categorisation framework and a multiregional dataset  
273 encompassing a range of taxonomic groups to report on decadal changes in introduction  
274 pathways reported for alien species since 1800. We highlighted the significant increase of  
275 documented events for almost every pathway at each of the three hierarchical levels of the  
276 CPC. Unintentional introductions have increased over intentional introductions since the  
277 beginning of the twentieth century. However, ‘Escape’ – an intentional pathway - is the most  
278 common pathway category documented, particularly for vectors related to plant and aquatic

279 cultivation. This shows that intentional pathway vectors are still an important source of alien  
280 introductions. The vast majority of documented introduction events, however, have an  
281 unknown vector (38.42 %), which emphasises the high level of uncertainty involved in  
282 categorising and managing alien species introduction pathways.

### 283 **Accidental and deliberate introduction events**

284 Prior to the twentieth century, the cumulative rate of increase for both intentional and  
285 unintentional introduction events documented were virtually identical (Figure 3b). The  
286 beginning of the twentieth century saw unintentional surpass intentional introductions, a trend  
287 that has continued up to the present. The increase in unintentional introductions is likely due  
288 to the rise in international trade, which is widely acknowledged as an important factor in  
289 allowing alien species to successfully establish in novel geographic regions (Levine and  
290 D'Antonio 2003, Perrings et al. 2005, Yemshanov et al. 2012, Chapman et al. 2017). In  
291 particular, the accidental transport of inconspicuous taxa, such as fungi, microorganisms,  
292 pathogens and invertebrates are often associated with global trade, including live plant  
293 imports and importation via shipping (Brockerhoff and Liebhold 2017, Chapman et al. 2017,  
294 Okabe et al. 2017). Studies from multiple regions including Europe (Chapman et al. 2017,  
295 Pergl et al. 2017, Saul et al. 2017), Asia (Hong et al. 2012, Okabe et al. 2017), the US  
296 (Liebhold et al. 2012) and the Antarctic (Osyczka et al. 2012, Houghton et al. 2016) have  
297 found that these taxonomic groups are more often associated with unintentional pathways.  
298 Increases in trade volume and the subsequent rise in accidental introductions of alien species  
299 may counteract existing national biosecurity and phytosanitary measures (Brockerhoff and  
300 Liebhold 2017). It is therefore important to improve measures for monitoring unintentional  
301 introduction pathways to effectively address the ongoing occurrence of accidental alien  
302 introductions. Interestingly, although unintentional introductions surpassed intentional

303 introductions, escape (an intentional introduction pathway category) had most associated  
304 introduction events (excluding unknown events). This highlights that the prevention and  
305 management of intentional introductions are of equal importance to those of unintentional  
306 introductions, especially given that the impact realised by alien taxa has been associated more  
307 frequently with intentional than unintentional introductions (Pergl et al. 2017).

### 308 **Introduction pathway categories and their vectors**

309 Our findings corroborate previous studies of alien introduction pathways in several ways.  
310 First, ‘escape’ is overall the most common documented pathway category by which alien  
311 species are introduced (Turbelin et al. 2017). Second, ‘transport-stowaway’ is becoming an  
312 increasingly important introduction pathway, particularly for marine stowaways (Zieritz et al.  
313 2017). Finally, records of introduction events via unknown pathways are prevalent in existing  
314 databases and presents an ongoing problem for assessing alien introductions (Katsanevakis  
315 and Moustakas 2018). Our global perspective takes into consideration alien species from  
316 multiple taxonomic groups but supports similar findings from studies focussing on specific  
317 taxonomic groups or regions.

318         Escape was the most prevalent pathway, with records almost doubling between 1970  
319 and the present (Figure 4b). Escape has been identified as the most frequent introduction  
320 pathway across all taxa at global (Turbelin et al. 2017) and national (South Africa; Faulkner  
321 et al. 2016) scales, for plants at country- (Czech republic; Pyšek et al. 2011; USA; Lehan et  
322 al. 2013) and city-scales (Padayachee et al. 2017) and for both plants (Pergl et al. 2017) and  
323 vertebrates in Europe (Saul et al. 2017, Roy et al. 2019) and globally (Saul et al. 2017, van  
324 Kleunen et al. 2018). Our results corroborate these findings at a multiregional level and  
325 emphasise the ongoing need for better containment procedures and greater public awareness

326 of the risks involving escaped organisms, particularly ornamental plants (Ricciardi et al.  
327 2017, Saul et al. 2017, van Kleunen et al. 2018).

328 Horticulture is the most important vector of alien plant introductions (Turbelin et al.  
329 2017, van Kleunen et al. 2018) and was the pathway subcategory with the largest and fastest  
330 increase in introduction events (Figure 5a). Agriculture was the second most important  
331 pathway subcategory and is also recognised as an important contributor to alien plant  
332 introductions (Mack and Erneberg 2002, Richardson et al. 2003). Both horticulture and  
333 agriculture are pathway subcategories specific to plants (Harrower et al. 2017) and their  
334 combined, high proportion of recorded introductions in the dataset (see Table 1) supports  
335 previous studies that show escape (from horticulture or agriculture) is an important pathway  
336 for plants.

337 The importance of escape as an introduction pathway for faunal species is reflected by  
338 the high number of introduction events attributed to escape from aquaculture/mariculture  
339 (e.g. fish farms) compared with the pet/aquarium trade. Aquaculture/mariculture had the third  
340 most introduction events, while records attributed to the pet/aquarium trade remained  
341 relatively stable across the assessed time-period (Figure 5a). Aquaculture was found to be the  
342 highest contributing pathway to freshwater alien species introductions in Europe (Nunes et al.  
343 2015) and an important pathway for alien invasions of European seas (Nunes et al. 2014).  
344 The ecological impacts of invasion via aquaculture can be severe (Naylor et al. 2001, Keller  
345 et al. 2011) and given the aquaculture sector is one of the fastest growing global primary  
346 industries (Teletchea and Fontaine 2014), it is also likely that alien introductions via this  
347 pathway will continue to rise.

348 Vectors of the transport-stowaway category were among those with largest growth in  
349 alien introductions since 1970 (Figure 5b). In particular, there was a sharp rise in the post-  
350 1970 introduction of marine stowaways as hitchhikers on ships, in ship ballast water or as

351 ship hull fouling, which saw 67 %, 62 % and 67 %, respectively. The importance of  
352 marine/aquatic pathways is also reflected in the sharp rise in introduction events by  
353 interconnected waterways since 1970 (Figure S1a). These increases in alien introductions are  
354 likely due to the continued expansion of tourism and international shipping (Early et al. 2016,  
355 Turbelin et al. 2017). The introduction of marine and freshwater alien taxa via shipping-  
356 related transport has been confirmed as an important source of ongoing propagule pressure in  
357 many parts of the world, including the Mediterranean region, Northwest Europe, the  
358 Northeast Pacific and Australia (Tingley et al. 2017, Zieritz et al. 2017, Anil and  
359 Krishnamurthy 2018).

360 A key challenge in attempting to decipher trends in alien introductions is uncertainty  
361 in the specific pathways used by species (Katsanevakis et al. 2013, Essl et al. 2015). This is  
362 particularly problematic for unintentional introductions via transport contaminants or  
363 stowaways, and for smaller organisms such as marine invertebrates that are at a higher risk of  
364 going unnoticed or undocumented (Essl et al. 2015, Ojaveer et al. 2017, Zieritz et al. 2017).  
365 The results shown here demonstrate the problem clearly: the total number of introduction  
366 events where a pathway category was unknown far exceeded all other known pathway  
367 categories (Figure 4b-c). The exception to this was the ‘escape’ pathway, an intentional  
368 pathway category that surpassed the number of unknown introduction events (Figure 4b).  
369 Furthermore, ‘unknown’ was the highest-ranked pathway subcategory in terms of the number  
370 of introduction events and was almost double that of the second-ranked subcategory  
371 (Horticulture; Table 1). These results corroborate previous studies that have demonstrated  
372 and highlighted the risk that uncertainty poses to introduction pathway datasets and trends  
373 (Zenetos et al. 2017, Katsanevakis and Moustakas 2018).

374 There are several reasons why uncertainty in pathway identification and trends occurs.  
375 Often, the lack of historical introduction records (i.e. pre-mid twentieth century; Ojaveer et al.



376 2017) can result in gaps in datasets that can particularly impact the interpretation of  
377 introduction temporal trends (McGeoch et al. 2010, Katsanevakis et al. 2013, Galil et al.  
378 2018). Usually this occurs due to decreased scientific effort or reduced awareness of the need  
379 to record alien species introductions (Ojaveer et al. 2017).

380 In many cases, multiple pathways are equally tenable as the cause of alien species  
381 introductions to a new region (Minchin 2007). This makes assigning the correct pathway  
382 difficult and decisions may be entirely based on the interpretations or assumptions of  
383 assessors (Zenetos et al. 2012). In other instances, the species' ecology may be used to infer  
384 an introduction pathway (Zenetos et al. 2012). A representative example of this is the  
385 introduction of marine species into the Mediterranean Sea via the Suez Canal. Several  
386 pathway vectors could feasibly be responsible for new introductions into the Mediterranean,  
387 including species as hitchhikers on ships, through ship ballast water or hull fouling, or  
388 through natural, unaided dispersal (Katsanevakis et al. 2013). These types of uncertainty can  
389 potentially over- or under-emphasise certain pathways, causing trends to be misrepresented at  
390 both global and regional scales. Using a confidence score in allocating pathways may provide  
391 a cautionary approach to the compilation of pathway data that helps identify which species,  
392 pathways or regions are particularly susceptible to uncertainty (Essl et al. 2015). A focus on  
393 improving monitoring of these identified species, pathways or regions may aid efforts to  
394 alleviate uncertainty in pathway data. Confidence scores have been successfully integrated  
395 into other alien-focused, standardised frameworks, such as the Environmental Impact  
396 Classification of Alien Taxa (EICAT; Blackburn et al. 2014, Hawkins et al. 2015) and have  
397 recently been used in assessing alien introduction pathways in Europe (Pergl et al. 2020).

398 The compilation of pathway data from multiple countries or regions can also be a  
399 source of uncertainty. Data is often unavailable in many countries, due to a lack of adequate  
400 monitoring, data collection efforts or funding (Latombe et al. 2017). Compiling data at

401 national or regional levels usually requires a well-established network of contacts and  
402 managing these networks can expend a great deal of time and effort (Zenetos et al. 2017).  
403 Furthermore, having multiple pathway data sources will result in multiple ways in which the  
404 data is formatted, leading to discrepancies between data. Enacting a standardised framework  
405 such as the CPC to filter and arrange pathway data will ensure that trends in introductions of  
406 alien species are reported accurately. This is crucial if pathways of introduction are to be  
407 considered as an accurate indicator for alien species invasions (Wilson et al. 2018). Given  
408 that trends in pathway introductions change over time and across regions, the accuracy and  
409 standardisation (or lack thereof) of data can greatly benefit or hinder monitoring and  
410 biosecurity efforts (McGeoch et al. 2016, Latombe et al. 2019).

411         Developing indicators from standardised pathway data is necessary for accurate  
412 reporting of alien introduction trends. These indicators can then be used to identify the  
413 shortcomings in invasive alien species management and policy targets and help improve  
414 legislation for dealing with biological invasions (McGeoch et al. 2010, Hulme 2015).  
415 Predictive tools such as risk assessments and horizon scanning can incorporate pathway  
416 indicators to better estimate the susceptibility of regions to invasion and identify those  
417 species that will pose the greatest introduction threat (Hulme 2015, Rabitsch et al. 2016). The  
418 continual input of new pathway data will be needed to ensure that indicators remain up to  
419 date and to prevent policy decisions relying on historical pathway patterns (Latombe et al.  
420 2019). Given that the Strategic Plan for Biodiversity 2011-2020 is coming to an end, and the  
421 2021-2030 phase is about to begin, the development and testing of pathway indicators for  
422 tracking invasive alien species trends becomes increasingly urgent (Rabitsch et al. 2016).

423

## 424 **Conclusions**

425 We propose that the CBD Pathway Categorisation framework is a suitable tool for providing  
426 standardised information on alien introduction pathways. This information can then be used  
427 to report on pathway trends and their changes across time, taxa, habitats and geographic  
428 scales. However, the high number of cases where introduction pathways are unknown will  
429 remain a significant challenge to the reporting and documentation of alien introductions  
430 (Latombe et al. 2019). Despite this, the CPC framework can enable countries to improve  
431 recording and reporting of alien introductions and assist in developing strategies to reduce the  
432 impacts of alien introductions beyond the Strategic Plan for Biodiversity 2011-2020.

433

#### 434 **Acknowledgements**

435 MAM acknowledges support from the Australian Research Council (DP200101680).

436 **References**

- 437 Anil AC, Krishnamurthy V (2018) Ship-mediated marine bioinvasions: need for a  
438 comprehensive global action plan. *ASEAN Journal on Science & Technology for*  
439 *Development* 35: 17-24. <https://doi.org/10.29037/ajstd.468>
- 440 Blackburn TM, Essl F, Evans T, Hulme PE, Jeschke JM, Kühn I, Kumschick S, Marková Z,  
441 Mrugała A, Nentwig W, Pergl J, Pyšek, Rabitsch W, Ricciardi A, Richardson DM,  
442 Sendek A, Vilà M, Wilson JRU, Winter M, Genovesi P, Bacher, S (2014) A unified  
443 classification of alien species based on the magnitude of their environmental impacts.  
444 *PLoS Biology* 12: e1001850. <https://doi.org/10.1371/journal.pbio.1001850>
- 445 Brockerhoff EG, Kimberley M, Liebhold AM, Haack RA, Cavey JF (2014) Predicting how  
446 altering propagule pressure changes establishment rates of biological invaders across  
447 species pools. *Ecology* 95: 594-601. <https://doi.org/10.1890/13-0465.1>
- 448 Brockerhoff EG, Liebhold AM (2017) Ecology of forest insect invasions. *Biological*  
449 *Invasions* 19: 3141-3159. <https://doi.org/10.1007/s10530-017-1514-1>
- 450 Burgiel S, Foote G, Orellana M, Perrault A (2006) Invasive alien species and trade:  
451 integrating prevention measures and international trade rules. Center for International  
452 Environmental Law and Defenders of Wildlife (Washington DC).
- 453 Butchart SHM, Walpole M, Collen B, van Strien A, Scharlemann JPW, Almond REA, Baillie  
454 JEM, Bomhard B, Brown C, Bruno J, Carpenter KE, Carr GM, Chanson J, Chenery  
455 AM, Csirke J, Davidson N, Dentener F, Foster M, Galli A, Galloway JN, Genovesi P,  
456 Gregory RD, Hockings M, Kapos V, Lamarque J-F, Leverington F, Loh J, McGeoch  
457 MA, McRae L, Minasyan A, Hernández Morcillo M, Oldfield TEE, Pauly D, Quader  
458 S, Revenga C, Sauer JR, Skolnik B, Spear D, Stanwell-Smith D, Stuart SN, Symes A,

- 459 Tierney M, Tyrrell TD, Vié J-C, Watson R (2010) Global biodiversity: indicators of  
460 recent declines. *Science* 328: 1164-1168. doi:10.1126/science.1187512
- 461 Chapman D, Purse BV, Roy HE, Bullock HE (2017) Global trade networks determine the  
462 distribution of invasive non-native species. *Global Ecology and Biogeography* 26:  
463 907-917. <https://doi.org/10.1111/geb.12599>
- 464 Convention on Biological Diversity (2010) Quick guide to the Aichi Biodiversity Targets. 9.  
465 Invasive species prevented and controlled. Retrieved from  
466 <https://www.cbd.int/doc/strategic-plan/targets/T9-quick-guide-en.pdf>
- 467 Dehnen-Schmutz K (2011) Determining non-invasiveness in ornamental plants to build green  
468 lists. *Journal of Applied Ecology* 48: 1374-1380. <https://doi.org/10.1111/j.1365-2664.2011.02061.x>
- 470 Early R, Bradley BA, Dukes JS, Lawler JJ, Olden JD, Blumenthal DM, Gonzalez P, Grosholz  
471 ED, Ibañez I, Miller LP, Sorte CJB, Tatem J (2016) Global threats from invasive alien  
472 species in the twenty-first century and national response capacities. *Nature*  
473 *Communications* 7: 12485. <https://doi.org/10.1038/ncomms12485>
- 474 Essl F, Bacher S, Blackburn TM, Booy O, Brundu G, Brunel S, Cardoso A-C, Eschen R,  
475 Gallardo B, Galil B, García-Berthou E, Genovesi P, Groom Q, Harrower C, Hulme  
476 PE, Katsanevakis S, Kenis M, Kühn I, Kumschick S, Martinou AF, Nentwig W,  
477 O'Flynn C, Pagad S, Pergl J, Pyšek, Rabitsch W, Richardson DM, Roques A, Roy  
478 HE, Scalera R, Schindler S, Seebens H, Vanderhoeven S, Vilà M, Wilson JRU,  
479 Zenetos A, Jeschke JM (2015) Crossing frontiers in tackling pathways of biological  
480 invasions. *BioScience* 65: 769-782. <https://doi.org/10.1093/biosci/biv082>
- 481 Essl F, Nehring S, Klingenstein F, Milasowszky N, Nowack C, Rabitsch W (2011) Review of  
482 risk assessment systems of IAS in Europe and introducing the German-Austrian Black

- 483 List Information System (GABLIS). *Journal of Nature Conservation* 19: 339-350.  
484 <https://doi.org/10.1016/j.jnc.2011.08.005>
- 485 Faulkner KT, Hulme PE, Pagad S, Wilson JRU, Robertson MP (2020) Classifying the  
486 introduction pathways of alien species: are we moving in the right direction?  
487 *NeoBiota* 62: 143-159. <https://doi.org/10.3897/neobiota.62.53543>
- 488 Faulkner KT, Robertson MP, Rouget M, Wilson JRU (2016) Understanding and managing  
489 the introduction pathways of alien taxa: South Africa as a case study. *Biological  
490 Invasions* 18: 73-87. <https://doi.org/10.1007/s10530-015-0990-4>
- 491 Galil BS, Marchini A, Occhipinti-Ambrogi A (2018) East is east and West is west?  
492 Management of marine bioinvasions in the Mediterranean Sea. *Estuarine, Coastal and  
493 Shelf Science* 201: 7-16. <https://doi.org/10.1016/j.ecss.2015.12.021>
- 494 Harrower CA, Scalera R, Pagad S, Schönrogge K, Roy HE (2017) Guidance for  
495 interpretation of CBD categories on introduction pathways. Technical note prepared  
496 by IUCN for the European Commission.  
497 [https://www.cbd.int/doc/c/9d85/3bc5/d640f059d03acd717602cd76/sbstta-22-inf-09-  
498 en.pdf](https://www.cbd.int/doc/c/9d85/3bc5/d640f059d03acd717602cd76/sbstta-22-inf-09-en.pdf)
- 499 Hawkins CL, Bacher S, Essl F, Hulme PE, Jeschke JM, Kühn I, Kumschick S, Nentwig W,  
500 Pergl J, Pyšek P, Rabitsch W, Richardson DM, Vilà M, Wilson JRU, Genovesi P,  
501 Blackburn TM (2015) Framework and guidelines for implementing the proposed  
502 IUCN Environmental Impact Classification for Alien Taxa (EICAT). *Diversity and  
503 Distributions* 21: 1360-1363. <https://doi.org/10.1111/ddi.12379>
- 504 Hong K-J, Lee J-H, Lee G-S, Lee S (2012) The status quo of invasive alien insect species and  
505 plant quarantine in Korea. *Journal of Asia-Pacific Entomology* 15: 521-532.  
506 <https://doi.org/10.1016/j.aspen.2012.06.003>

- 507 Houghton M, McQuillan PB, Bergstrom DM, Frost L, van den Hoff J, Shaw J (2016)  
508 Pathways of alien invertebrate transfer to the Antarctic region. *Polar Biology* 39: 23-  
509 33. <https://doi.org/10.1007/s00300-014-1599-2>
- 510 Hulme PE (2015) Invasion pathways at a crossroad: policy and research challenges for  
511 managing alien species introductions. *Journal of Applied Ecology* 52: 1418-1424.  
512 <https://doi.org/10.1111/1365-2664.12470>
- 513 Hulme PE, Bacher S, Kenis M, Klotz S, Kühn I, Minchin D, Nentwig W, Olenin S, Panov V,  
514 Pergl J, Pyšek P, Roques A, Sol D, Solarz W, Vilà M (2008) Grasping at the routes of  
515 biological invasions: a framework for integrating pathways into policy. *Journal of*  
516 *Applied Ecology* 45: 403-414. <https://doi.org/10.1111/j.1365-2664.2007.01442.x>
- 517 Hulme PE, Brundu G, Carboni M, Dehnen-Schmutz K, Dullinger S, Early R, Essl F,  
518 González-Moreno P, Groom QJ, Kueffer C, Kühn I, Maurel N, Novoa A, Pergl J,  
519 Pyšek P, Seebens H, Tanner R, Touza JM, van Kleunen M, Verbrugge LNH (2017)  
520 Integrating invasive species policies across ornamental horticulture supply chains to  
521 prevent plant invasions. *Journal of Applied Ecology* 55: 92-98.  
522 <https://doi.org/10.1111/1365-2664.12953>
- 523 Katsanevakis S, Moustakas A (2018) Uncertainty in marine invasion science. *Frontiers in*  
524 *Marine Science* 5: 38. <https://doi.org/10.3389/fmars.2018.00038>
- 525 Katsanevakis S, Zenetos A, Belchior C, Cardoso AC (2013) Invading European Seas:  
526 Assessing pathways of introduction of marine aliens. *Ocean & Coastal Management*  
527 76: 64-74. <https://doi.org/10.1016/j.ocecoaman.2013.02.024>
- 528 Keller RP, Geist J, Jeschke JM, Kühn I (2011) Invasive species in Europe: ecology, status,  
529 and policy. *Environmental Sciences Europe* 23. [https://doi.org/10.1186/2190-4715-](https://doi.org/10.1186/2190-4715-23-23)  
530 23-23

- 531 Kumschick S, Devenish A, Kenis M, Rabitsch W, Richardson DM, Wilson JRU (2016)  
532 Intentionally introduced terrestrial invertebrates: patterns, risks, and options for  
533 management. *Biological Invasions* 18: 1077-1088. [https://doi.org/10.1007/s10530-](https://doi.org/10.1007/s10530-016-1086-5)  
534 016-1086-5
- 535 Kumschick S, Richardson DM (2013) Species-based risk assessments for biological  
536 invasions: advances and challenges. *Diversity and Distributions* 19: 1095-1105.  
537 <https://doi.org/10.1111/ddi.12110>
- 538 Latombe G, Canavan S, Hirsch H, Hui C, Kumschick S, Nsikani MM, Potgieter LJ, Robinson  
539 TB, Saul W-C, Turner SC, Wilson JRU, Yannelli FA, Richardson DM (2019) A four-  
540 component classification of uncertainties in biological invasions: implications for  
541 management. *Ecosphere* 10: e02669. <https://doi.org/10.1002/ecs2.2669>
- 542 Latombe G, Pyšek P, Jeschke JM, Blackburn TM, Bacher S, Caphina C, Costello MJ,  
543 Fernández M, Gregory RD, Hobern D, Hui C, Jetz W, Kumschick S, McGrannachan  
544 C, Pergl J, Roy HE, Scalera R, Squires ZE, Wilson JRU, Winter M, Genovesi P,  
545 McGeoch MA (2017) A vision for global monitoring of biological invasions.  
546 *Biological Conservation* 213: 295-308. <https://doi.org/10.1016/j.biocon.2016.06.013>
- 547 Lehan NE, Murphy JR, Thorburn LP, Bradley BA (2013) Accidental introductions are an  
548 important source of invasive plants in the continental United States. *American Journal*  
549 *of Botany* 100: 1287-1293. <https://doi.org/10.3732/ajb.1300061>
- 550 Levine JM, D'Antonio CM (2003) Forecasting biological invasions with increasing  
551 international trade. *Conservation Biology* 17: 322-326. [https://doi.org/10.1046/j.1523-](https://doi.org/10.1046/j.1523-1739.2003.02038.x)  
552 1739.2003.02038.x
- 553 Leung B, Lodge DM, Finnoff D, Shogren JF, Lewis MA, Lambert G (2002) An ounce of  
554 prevention or a pound of cure: bioeconomic risk analysis of invasive species.



555 Proceedings of the Royal Society of London B: Biological Sciences 269: 2407-2413.

556 <http://dx.doi.org/10.1098%2Frspb.2002.2179>

557 Leung B, Springborn MR, Turner JA, Brockerhoff EG (2014) Pathway-level risk analysis:

558 the net present value of an invasive species policy in the US. *Frontiers in Ecology and*

559 *the Environment* 12: 273-279. <https://doi.org/10.1890/130311>

560 Liebhold AM, Brockerhoff EG, Garrett LJ, Parke JL, Britton KO (2012). Live plant imports:

561 the major pathway for forest insect and pathogen invasions of the US. *Frontiers in*

562 *Ecology and the Environment* 10: 135-143. <https://doi.org/10.1890/110198>

563 Mack RN, Erneberg M (2002) The United States naturalized flora: largely the product of

564 deliberate introductions. *Annals of the Missouri Botanical Garden* 89: 176-189.

565 doi:10.2307/3298562

566 McGeoch MA, Butchart SHM, Spear D, Marais E, Kleynhans EJ, Symes A, Chanson J,

567 Hoffmann M (2010) Global indicators of biological invasion: species numbers,

568 biodiversity impact and policy responses. *Diversity and Distributions* 16: 95-108.

569 <https://doi.org/10.1111/j.1472-4642.2009.00633.x>

570 McGeoch MA, Genovesi P, Bellingham PJ, Costello MJ, McGrannachan CM, Sheppard A

571 (2016) Prioritizing species, pathways, and sites to achieve conservation targets for

572 biological invasions. *Biological Invasions* 18: 299-314.

573 <https://doi.org/10.1007/s10530-015-1013-1>

574 McGeoch MA, Jetz W (2019) Measure and Reduce the Harm Caused by Biological

575 Invasions. *One Earth* 1: 171-174.

- 576 Minchin D (2007) Aquaculture and transport in a changing environment: overlap and links in  
577 the spread of alien biota. *Marine Pollution Bulletin* 55: 302-313.  
578 <https://doi.org/10.1016/j.marpolbul.2006.11.017>
- 579 Naylor RL, Williams SL, Strong DR (2001). Aquaculture – a gateway for exotic species.  
580 *Science* 294: 1655-1656. doi:10.1126/science.1064875
- 581 Nunes AL, Katsanevakis S, Zenetos A, Cardoso AC (2014) Gateways to alien invasions in  
582 the European seas. *Aquatic Invasions* 9: 133-144.  
583 <http://dx.doi.org/10.3391/ai.2014.9.2.02>
- 584 Nunes AL, Tricarico E, Panov VE, Cardoso AC, Katsanevakis S (2015) Pathways and  
585 gateways of freshwater invasions in Europe. *Aquatic Invasions* 10: 359-370.  
586 <http://dx.doi.org/10.3391/ai.2015.10.4.01>
- 587 Ojaveer H, Olenin S, Narščiū A, Florin A-B, Ezhova E, Gollasch S, Jensen KR, Lehtiniemi  
588 M, Minchin D, Normant-Saremba M, Strāke S (2017) Dynamics of biological  
589 invasions and pathways over time: a case study of a temperate coastal sea. *Biological*  
590 *Invasions* 19: 799-813. <https://doi.org/10.1007/s10530-016-1316-x>
- 591 Okabe K, Masuya H, Kanzaki N (2017) Unintentional introductions of microscopic  
592 organisms associated with forest insects. *Biological Invasions* 19: 3229-3242.  
593 <https://doi.org/10.1007/s10530-017-1507-0>
- 594 Osyczka P, Mleczko P, Karasiński D, Chlebicki A (2012) Timber transported to Antarctica: a  
595 potential and undesirable carrier for alien fungi and insects. *Biological Invasions* 14:  
596 15-20. <https://doi.org/10.1007/s10530-011-9991-0>

- 597 Pagad S, Genovesi P, Carnevali L, Schigel D, McGeoch MA (2018) Introducing the global  
598 register of introduced and invasive species. *Scientific Data* 5: 170202.  
599 <https://doi.org/10.1038/sdata.2017.202>
- 600 Padayachee AL, Irlich UM, Faulkner KT, Gaertner M, Procheş Ş, Wilson JRU, Rouget M  
601 (2017) How do invasive species travel to and through urban environments? *Biological*  
602 *Invasions* 19: 3557-3570. <https://doi.org/10.1007/s10530-017-1596-9>
- 603 Pergl J, Brundu G, Harrower CA, Cardoso AC, Genovesi P, Katsanevakis S, Lozano V,  
604 Perglová I, Rabitsch W, Richards G, Roques A, Rorke SL, Scalera R, Schönrogge K,  
605 Stewart A, Tricarico E, Tsiamis K, Vannini A, Vilà M, Zenetos A, Roy HE (2020)  
606 Applying the Convention on Biological Diversity Pathway Classification to alien  
607 species in Europe. *NeoBiota* 62: 333-363. doi: 10.3897/neobiota.62.53796
- 608 Pergl J, Pyšek P, Bacher S, Essl F, Genovesi P, Harrower CA, Hulme PE, Jeschke JM, Kenis  
609 M, Kühn I, Perglová I, Rabitsch W, Roques A, Roy DB, Roy HE, Vilà M, Winter M,  
610 Nentwig W (2017) Troubling travellers: are ecologically harmful alien species  
611 associated with particular introduction pathways? *NeoBiota* 32: 1-20.  
612 <https://doi.org/10.3897/neobiota.32.10199>
- 613 Perrings C, Dehnen-Schmutz K, Touza J, Williamson M (2005) How to manage biological  
614 invasions under globalization. *Trends in Ecology and Evolution* 20: 212-215.  
615 <https://doi.org/10.1016/j.tree.2005.02.011>
- 616 Puth LM, Post DM (2005) Studying invasion: have we missed the boat? *Ecology Letters* 8:  
617 715-721. <https://doi.org/10.1111/j.1461-0248.2005.00774.x>
- 618 Pyšek P, Jarošík V, Pergl J (2011) Alien plants introduced by different pathways differ in  
619 invasion success: unintentional introductions as a threat to natural areas. *PloS One* 6:  
620 e24890. <https://doi.org/10.1371/journal.pone.0024890>

- 621 Rabitsch W, Genovesi P, Scalera R, Biala K, Josefsson M, Essl F (2016) Developing and  
622 testing alien species indicators for Europe. *Journal for Nature Conservation* 29: 89-96.  
623 <https://doi.org/10.1016/j.jnc.2015.12.001>
- 624 Rabitsch W, Milasowszky N, Nehring S, Wiesner C, Wolter C, Essl F (2013) The times are  
625 changing: temporal shifts in patterns of fish invasions in central European fresh  
626 waters. *Journal of Fish Biology* 82: 17-33. [https://doi.org/10.1111/j.1095-](https://doi.org/10.1111/j.1095-8649.2012.03457.x)  
627 [8649.2012.03457.x](https://doi.org/10.1111/j.1095-8649.2012.03457.x)
- 628 Ricciardi A, Blackburn TM, Carlton JT, Dick JTA, Hulme PE, Iacarella JC, Jeschke JM,  
629 Liebhold AM, Lockwood JL, MacIsaac HJ, Pyšek P, Richardson DM, Ruiz GM,  
630 Simberloff D, Sutherland WJ, Wardle DA, Aldridge DC (2017) Invasion science: a  
631 horizon scan of emerging challenges and opportunities. *Trends in Ecology &*  
632 *Evolution* 32: 464-474. <http://dx.doi.org/10.1016/j.tree.2017.03.007>
- 633 Richardson DM, Cambray JA, Chapman RA, Dean WRJ, Griffiths CL, Le Maitre DC,  
634 Newton DJ, Winstanley TJ (2003) Vectors and pathways of biological invasions in  
635 South Africa – past, future and present. In G. Ruiz & J. Carlton (Eds.), *Invasive*  
636 *species: vectors and management strategies* (pp. 292-349). Island Press (Washington  
637 DC).
- 638 Richardson DM, Pyšek P, Carlton JT (2010) A compendium of essential concepts and  
639 terminology in invasion ecology. In D.M. Richardson (Ed.), *Fifty years of invasion*  
640 *ecology: the legacy of Charles Elton* (pp. 409-420). Wiley-Blackwell.  
641 <https://doi.org/10.1002/9781444329988.ch30>
- 642 Rout TM, Moore JL, Possingham HP, McCarthy MA (2011) Allocating biosecurity resources  
643 between preventing, detecting, and eradicating island invasions. *Ecological*  
644 *Economics* 71: 54-62. <https://doi.org/10.1016/j.ecolecon.2011.09.009>

645 Roy HE, Bacher S, Essl F, Adriaens T, Aldridge DC, Bishop JDD, Blackburn TM, Branquart  
646 E, Brodie J, Carboneras C, Cottier-Cook EJ, Copp GH, Dean HJ, Eilenberg J,  
647 Gallardo B, Garcia M, García-Berthou E, Genovesi P, Hulme PE, Kenis M, Kerckhof  
648 F, Kettunen M, Minchin D, Nentwig W, Nieto A, Pergl J, Pescott OL, Peyton JM,  
649 Preda C, Roques A, Rorke SL, Scalera R, Schindler S, Schönrogge K, Sewell J,  
650 Solarz W, Stewart AJA, Tricarico E, Vanderhoeven S, van der Velde G, Vilà M,  
651 Wood CA, Zenetos A, Rabitsch W (2019) Developing a list of invasive alien species  
652 likely to threaten biodiversity and ecosystems in the European Union. *Global Change*  
653 *Biology* 25: 1032-1048. <https://doi.org/10.1111/gcb.14527>

654 Roy H, Schonrogge K, Dean H, Peyton J, Branquart E, Vanderhoeven S, Copp G, Stebbing  
655 P, Kenis M, Rabitsch W, Essl F, Schindler S, Brunel S, Kettunen M, Mazza L, Nieto  
656 A, Kemp J, Genovesi P, Scalera R, Stewart A (2014) Invasive alien species –  
657 framework for the identification of invasive alien species of EU concern  
658 (ENV.B.2/ETU/2013/0026). European Commission.

659 Saul W-C, Roy HE, Booy O, Carnevali L, Chen H-J, Genovesi P, Harrower CA, Hulme PE,  
660 Pagad S, Pergl J, Jeschke JM (2017) Assessing patterns in introduction pathways of  
661 alien species by linking major invasion databases. *Journal of Applied Ecology* 54:  
662 657-669. <https://doi.org/10.1111/1365-2664.12819>

663 Seebens H, Blackburn TM, Dyer EF, Genovesi P, Hulme PE, Jeschke JM, Pagad S, Pyšek P,  
664 van Kleunen M, Winter M, Ansong M, Arianoutsou M, Bacher S, Blasius B,  
665 Brockerhoff EG, Brundu G, Capinha C, Causton CE, Celesti-Grapow L, Dawson W,  
666 Dullinger S, Economo EP, Fuentes N, Guénard B, Jäger H, Kartesz J, Kenis M, Kühn  
667 I, Lenzner B, Liebhold AM, Mosena A, Moser D, Nentwig W, Nishino M, Pearman  
668 D, Pergl J, Rabitsch W, Rojas-Sandoval J, Roques A, Rorke S, Rossinelli S, Roy HE,

- 669 Scalera R, Schindler S, Stajerová K, Tokarska-Guzik B, Walker K, Ward DF,  
670 Yamanaka T, Essl F (2018) Global rise in emerging alien species results from  
671 increased accessibility of new source pools. *Proceedings of the National Academy of*  
672 *Sciences* 115: E2264-E2273. <https://doi.org/10.1073/pnas.1719429115>
- 673 Seebens H, Blackburn TM, Dyer EF, Genovesi P, Hulme PE, Jeschke JM, Pagad S, Pyšek P,  
674 Winter M, Arianoustou M, Bacher S, Blasius B, Brundu G, Capinha C, Celesti-  
675 Grapow L, Dawson W, Dullinger S, Fuentes N, Jäger H, Kartesz J, Kenis M, Kreft H,  
676 Kühn I, Lenzner B, Liebhold A, Mosena A, Moser D, Nishino M, Perman D, Pergl J,  
677 Rabitsch W, Rojas-Sandoval J, Roques A, Rorke S, Rossinelli S, Roy HE, Scalera R,  
678 Schindler S, Štajerová K, Tokarska-Guzik B, van Kluenen M, Walker K, Weigelt P,  
679 Yamanaka T, Essl F (2017) No saturation in the accumulation of alien species  
680 worldwide. *Nature Communications* 8: 14435.  
681 <https://dx.doi.org/10.1038/ncomms14435>
- 682 Seebens H, Clarke DA, Groom Q, Wilson JRU, García-Berthou E, Kühn I, Roigé M, Pagad  
683 S, Essl F, Vicente J, Winter M, McGeoch M (2020) A workflow for standardising and  
684 integrating alien species distribution data. *NeoBiota* 59: 39-59.  
685 <https://doi.org/10.3897/neobiota.59.53578>
- 686 Teletchea F, Fontaine P (2014) Levels of domestication in fish: implications for the  
687 sustainable future of aquaculture. *Fish and Fisheries* 15: 181-195.  
688 <https://doi.org/10.1111/faf.12006>
- 689 Tingley R, García-Díaz P, Rani Rocha Arantes C, Cassey P (2018) Integrating transport  
690 pressure data and species distribution models to estimate invasion risk for alien  
691 stowaways. *Ecography* 41: 635-646. <https://doi.org/10.1111/ecog.02841>

- 692 Tsiamis K, Cardoso AC, Gervasini E (2017). The European Alien Information Network on  
693 the Convention on Biological Diversity pathways categorization. *NeoBiota* 32: 21-29.  
694 <https://doi.org/10.3897/neobiota.32.9429>
- 695 Turbelin AJ, Malamud BD, Francis RA (2017) Mapping the global state of invasive alien  
696 species: patterns of invasion and policy responses. *Global Ecology and Biogeography*  
697 26: 78-92. <https://doi.org/10.1111/geb.12517>
- 698 UNEP (2014) Pathways of introduction of invasive species, their prioritization and  
699 management. UNEP/CBD/SBSTTA/18/9/Add.1, subsidiary body on scientific,  
700 technical and technological advice, eighteenth meeting, Montreal.  
701 [www.cbd.int/doc/meetings/sbstta/sbstta-18/official/](http://www.cbd.int/doc/meetings/sbstta/sbstta-18/official/sbstta-18-09-add1-en.pdf)  
702 [sbstta-18-09-add1-en.pdf](http://www.cbd.int/doc/meetings/sbstta/sbstta-18/official/sbstta-18-09-add1-en.pdf). Decision XII/17 CBD COP12
- 703 van Kleunen M, Essl F, Pergl J, Brundu G, Carboni M, Dullinger S, Early R, González-  
704 Moreno P, Groom QJ, Hulme PE, Kueffer C, Kühn I, Máguas C, Maurel N, Novoa A,  
705 Parepa M, Pyšek P, Seebens H, Tanner R, Touza J, Verbrugge L, Weber E, Dawson  
706 W, Kreft H, Weigelt P, Winter M, Klonner G, Talluto MV, Dehnen-Schmutz K  
707 (2018) The changing role of ornamental horticulture in alien plant invasions.  
708 *Biological Reviews* 93: 1421-1437. <https://doi.org/10.1111/brv.12402>
- 709 Wilson JRU, Faylkner KT, Rahlao SJ, Richardson DM, Zengeya TA, van Wilgen BW (2018)  
710 Indicators for monitoring biological invasions at a national level. *Journal of Applied*  
711 *Ecology* 55: 2612-2620. <https://doi.org/10.1111/1365-2664.13251>
- 712 Yemshanov D, Koch FH, Ducey M, Koehler K (2012) Trade-associated pathways of alien  
713 forest insect entries in Canada. *Biological Invasions* 14: 797-812.  
714 <https://doi.org/10.1007/s10530-011-0117-5>

- 715 Zenetos A, Çınar ME, Crocetta F, Golani D, Rosso A, Servello G, Shenkar N, Turon X,  
716 Verlaque M (2017) Uncertainties and validation of alien species catalogues: The  
717 Mediterranean as an example. *Estuarine, Coastal and Shelf Science* 191: 171-187.  
718 <https://doi.org/10.1016/j.ecss.2017.03.031>
- 719 Zenetos A, Gofas S, Morri C, Rosso A, Violanti D, García Raso JE, Çınar ME, Almogi-Labin  
720 A, Ates AS, Azzurro E, Ballesteros E, Bianchi CN, Bilecenoglu M, Gambi MC,  
721 Giangrande A, Gravili C, Hyams-Kaphzan O, Karachle PK, Katsanevakis S, Lipej L,  
722 Mastrototaro F, Mineur F, Pancucci-Papadopoulou MA, Ramos Esplá A, Salas C, San  
723 Martin G, Sfriso A, Streftaris N, Verlaque M (2012) Alien species in the  
724 Mediterranean Sea by 2012. A contribution to the application of European Union's  
725 Marine Strategy Framework Directive (MSFD). Part 2. Introduction trends and  
726 pathways. *Mediterranean Marine Science* 13: 328-352.  
727 <https://doi.org/10.12681/mms.327>
- 728 Zieritz A, Gallardo B, Baker SJ, Britton JR, van Valkenburg JLCH, Verreycken H, Aldridge  
729 DC (2017) Changes in pathways and vectors of biological invasions in Northwest  
730 Europe. *Biological Invasions* 19: 269-282. <https://doi.org/10.1007/s10530-016-1278-z>



731 **Tables**

732 **Table 1:** Summary of introduction pathways and their documented introduction events.

733 Bracketed numbers represent the number of subcategories categorised as “other”.

| <b>Total Number of Documented Introduction Events: 18746</b> |                                            |                                                  |             |
|--------------------------------------------------------------|--------------------------------------------|--------------------------------------------------|-------------|
| <b>Introduction Pathway</b>                                  | <b># of Documented Introduction Events</b> | <b>% of Total Documented Introduction Events</b> | <b>Rank</b> |
| <b>Pathway Type</b>                                          |                                            |                                                  |             |
| Intentional                                                  | 8172                                       | 43.59                                            | 2           |
| Unintentional                                                | 10574                                      | 56.41                                            | 1           |
| <b>Pathway Category</b>                                      |                                            |                                                  |             |
| Release                                                      | 1078                                       | 5.75                                             | 5           |
| Escape                                                       | 7094                                       | 37.84                                            | 1           |
| Transport-Contaminant                                        | 1982                                       | 10.57                                            | 3           |
| Transport-Stowaway                                           | 1581                                       | 8.43                                             | 4           |
| Corridors                                                    | 828                                        | 4.42                                             | 5           |
| Unaided                                                      | 148                                        | 0.79                                             | 6           |
| Unknown                                                      | 6035                                       | 32.19                                            | 2           |
| <b>Pathway Subcategory</b>                                   |                                            |                                                  |             |
| Release: Biological control                                  | 109                                        | 0.58                                             | 18          |
| Release: Fishery in the wild                                 | 248                                        | 1.32                                             | 14          |
| Release: Landscape/flora/fauna improvement                   | 342                                        | 1.82                                             | 11          |
| Release: Other subcategories (4)                             | 110                                        | 0.59                                             | n/a         |
| Release: Release in nature for use                           | 229                                        | 1.22                                             | 15          |
| Escape: Agriculture                                          | 1193                                       | 6.36                                             | 3           |
| Escape: Aquaculture/mariculture                              | 1010                                       | 5.39                                             | 4           |
| Escape: Forestry                                             | 273                                        | 1.46                                             | 13          |
| Escape: Horticulture                                         | 3581                                       | 19.10                                            | 2           |
| Escape: Ornamental purpose                                   | 475                                        | 2.53                                             | 7           |
| Escape: Pet/aquarium species                                 | 288                                        | 1.54                                             | 12          |
| Escape: Other subcategories (6)                              | 204                                        | 1.09                                             | n/a         |
| Transport-contaminant: Seed contaminant                      | 654                                        | 3.54                                             | 6           |
| Transport-contaminant: Timber trade                          | 190                                        | 1.01                                             | 16          |
| Transport-contaminant: Other subcategories (8)               | 310                                        | 1.65                                             | n/a         |
| Transport-stowaway: Hitchhikers on ship/boat                 | 412                                        | 2.20                                             | 10          |
| Transport-stowaway: Ship/boat ballast water                  | 447                                        | 2.38                                             | 8           |
| Transport-stowaway: Ship/boat hull fouling                   | 422                                        | 2.25                                             | 9           |
| Transport-stowaway: Other subcategories (8)                  | 82                                         | 0.44                                             | n/a         |
| Corridors: Interconnected waterways/basins/seas              | 827                                        | 4.41                                             | 5           |
| Corridors: Other subcategories (1)                           | 0                                          | 0.00                                             | n/a         |
| Unaided: Natural dispersal across borders                    | 137                                        | 0.73                                             | 17          |

|     |                  |      |       |   |
|-----|------------------|------|-------|---|
| 734 | Unknown: Unknown | 7203 | 38.42 | 1 |
|-----|------------------|------|-------|---|

735 **Table 2.** Decadal increase in documented intentional and unintentional introduction events  
 736 for the period 1810 to 2011.

| <b>Decade</b>   | <b>Documented<br/>Intentional<br/>Introduction<br/>Events</b> | <b>Documented<br/>Unintentional<br/>Introduction<br/>Events</b> | <b>Intentional<br/>Decadal<br/>Growth<br/>(%)</b> | <b>Unintentional<br/>Decadal<br/>Growth (%)</b> | <b>Difference<br/>Between<br/>Intentional /<br/>Unintentional<br/>Decadal<br/>Growth<br/>Rates</b> |
|-----------------|---------------------------------------------------------------|-----------------------------------------------------------------|---------------------------------------------------|-------------------------------------------------|----------------------------------------------------------------------------------------------------|
| Pre-1800        | 553                                                           | 473                                                             | n/a                                               | n/a                                             | n/a                                                                                                |
| 1810            | 585                                                           | 507                                                             | 5.79                                              | 7.19                                            | 1.40                                                                                               |
| 1820            | 646                                                           | 575                                                             | 10.43                                             | 13.41                                           | 2.98                                                                                               |
| 1830            | 772                                                           | 693                                                             | 19.50                                             | 20.52                                           | 1.02                                                                                               |
| 1840            | 869                                                           | 790                                                             | 12.56                                             | 14.00                                           | 1.43                                                                                               |
| 1850            | 1056                                                          | 951                                                             | 21.52                                             | 20.38                                           | 1.14                                                                                               |
| 1860            | 1218                                                          | 1129                                                            | 15.34                                             | 18.72                                           | 3.38                                                                                               |
| 1870            | 1500                                                          | 1359                                                            | 23.15                                             | 20.37                                           | 2.78                                                                                               |
| 1880            | 1707                                                          | 1636                                                            | 13.80                                             | 20.38                                           | 6.58                                                                                               |
| 1890            | 1981                                                          | 1953                                                            | 16.05                                             | 19.38                                           | 3.32                                                                                               |
| 1900            | 2314                                                          | 2435                                                            | 16.81                                             | 24.68                                           | 7.87                                                                                               |
| 1910            | 2587                                                          | 2868                                                            | 11.80                                             | 17.78                                           | 5.98                                                                                               |
| 1920            | 2854                                                          | 3316                                                            | 10.32                                             | 15.62                                           | 5.30                                                                                               |
| 1930            | 3251                                                          | 3918                                                            | 13.91                                             | 18.15                                           | 4.24                                                                                               |
| 1940            | 3603                                                          | 4521                                                            | 10.83                                             | 15.39                                           | 4.56                                                                                               |
| 1950            | 4009                                                          | 5064                                                            | 11.27                                             | 12.01                                           | 0.74                                                                                               |
| 1960            | 4550                                                          | 5773                                                            | 13.49                                             | 14.00                                           | 0.51                                                                                               |
| 1970            | 5105                                                          | 6437                                                            | 12.20                                             | 11.50                                           | 0.70                                                                                               |
| 1980            | 5663                                                          | 7188                                                            | 10.93                                             | 11.67                                           | 0.74                                                                                               |
| 1990            | 6516                                                          | 7937                                                            | 15.06                                             | 10.42                                           | 4.64                                                                                               |
| 2000            | 7313                                                          | 9279                                                            | 12.23                                             | 16.91                                           | 4.68                                                                                               |
| 2010            | 7993                                                          | 10445                                                           | 9.30                                              | 12.57                                           | 3.27                                                                                               |
| 2011 >          | 8172                                                          | 10574                                                           | 2.24                                              | 1.24                                            | 1.00                                                                                               |
| <b>Average</b>  | n/a                                                           | n/a                                                             | <b>13.12</b>                                      | <b>15.29</b>                                    | <b>3.10</b>                                                                                        |
| <b>Std Dev.</b> | n/a                                                           | n/a                                                             | <b>4.70</b>                                       | <b>5.25</b>                                     | <b>2.17</b>                                                                                        |

737

738 **Table 3.** Trends in recoded introduction events by pathway across the period 1800 to 2017.  
 739 Generalized linear model results (family = negative binomial, link = log). Significant *p* values  
 740 (*p* < 0.05) shown in bold.

| <b>Pathway Type</b>                 | <b>Slope</b>       |                   |           |          |                 |
|-------------------------------------|--------------------|-------------------|-----------|----------|-----------------|
|                                     | <b>coefficient</b> | <b>Std. Error</b> | <b>df</b> | <b>z</b> | <b><i>p</i></b> |
| Intentional                         | 0.011              | 0.001             | 20        | 8.427    | < <b>0.001</b>  |
| Unintentional                       | 0.013              | 0.002             | 20        | 8.568    | < <b>0.001</b>  |
| <b>Pathway Category</b>             |                    |                   |           |          |                 |
| Release                             | 0.012              | 0.002             | 20        | 5.764    | < <b>0.001</b>  |
| Escape                              | 0.011              | 0.001             | 20        | 8.608    | < <b>0.001</b>  |
| Transport - contaminant             | 0.01               | 0.002             | 20        | 5.493    | < <b>0.001</b>  |
| Transport - stowaway                | 0.021              | 0.002             | 20        | 11.25    | < <b>0.001</b>  |
| Corridor                            | 0.035              | 0.003             | 20        | 10.156   | < <b>0.001</b>  |
| Unaided                             | 0.026              | 0.003             | 20        | 7.787    | < <b>0.001</b>  |
| Unknown                             | 0.01               | 0.002             | 20        | 6.408    | < <b>0.001</b>  |
| <b>Pathway Subcategory</b>          |                    |                   |           |          |                 |
| Release: Biological control         | 0.017              | 0.004             | 20        | 4.858    | < <b>0.001</b>  |
| Release: Fishery in the wild        | 0.016              | 0.004             | 20        | 4.253    | < <b>0.001</b>  |
| Release: Landscape "improvement"    | 0.012              | 0.002             | 20        | 5.075    | < <b>0.001</b>  |
| Release: Release in nature for use  | 0.001              | 0.002             | 20        | 0.421    | 0.674           |
| Escape: Agriculture                 | 0.004              | 0.002             | 20        | 2.017    | <b>0.045</b>    |
| Escape: Aquaculture/mariculture     | 0.028              | 0.003             | 20        | 8.975    | < <b>0.001</b>  |
| Escape: Forestry                    | 0.006              | 0.002             | 20        | 2.858    | <b>0.004</b>    |
| Escape: Horticulture                | 0.009              | 0.001             | 20        | 7.632    | < <b>0.001</b>  |
| Escape: Ornamental purpose          | 0.012              | 0.002             | 20        | 5.429    | < <b>0.001</b>  |
| Escape: Pet/aquarium species        | 0.024              | 0.003             | 20        | 8.628    | < <b>0.001</b>  |
| Contaminant: Seed contaminant       | 0.01               | 0.002             | 20        | 5.644    | < <b>0.001</b>  |
| Contaminant: Timber trade           | 0.032              | 0.005             | 20        | 6.581    | < <b>0.001</b>  |
| Stowaway: Hitchhikers on ship/boat  | 0.028              | 0.003             | 20        | 8.316    | < <b>0.001</b>  |
| Stowaway: Ship/boat ballast water   | 0.021              | 0.003             | 20        | 7.633    | < <b>0.001</b>  |
| Stowaway: Ship/boat hull fouling    | 0.023              | 0.003             | 20        | 8.457    | < <b>0.001</b>  |
| Corridors: Interconnected waterways | 0.035              | 0.003             | 20        | 10.155   | < <b>0.001</b>  |

|                            |       |       |    |       |                |
|----------------------------|-------|-------|----|-------|----------------|
| Unaided: Natural dispersal | 0.025 | 0.003 | 20 | 7.514 | < <b>0.001</b> |
| Subcategory unknown        | 0.01  | 0.002 | 20 | 6.408 | < <b>0.001</b> |

---

741

742 **Figures**

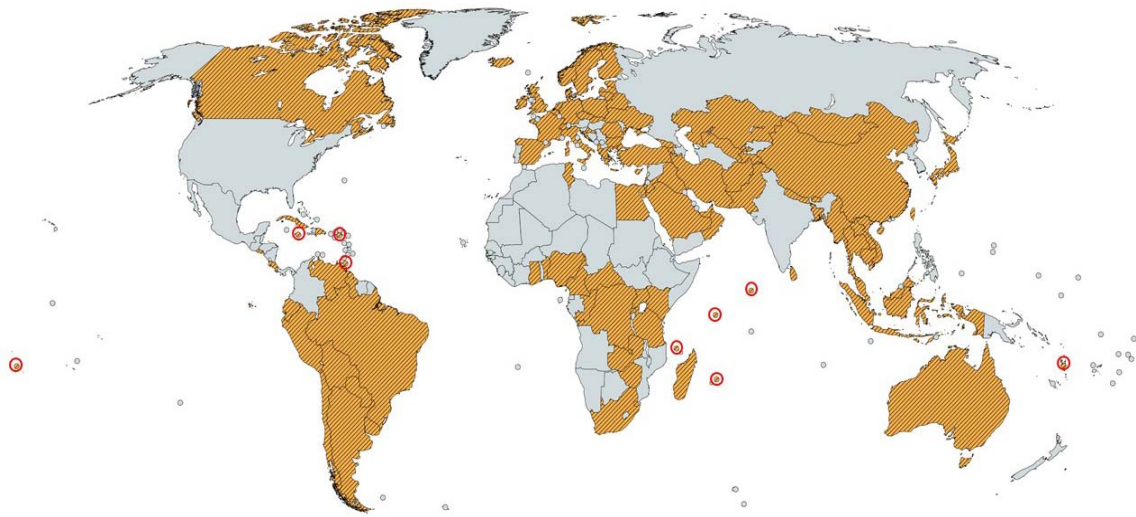

743

744 **Figure 1.** The 101 countries (orange) used to conduct the global pathways assessment. Red  
745 open circles indicate small island nations (n = 9) (<https://mapchart.net/>; accessed 30 July  
746 2019).

747

748

749

750

751

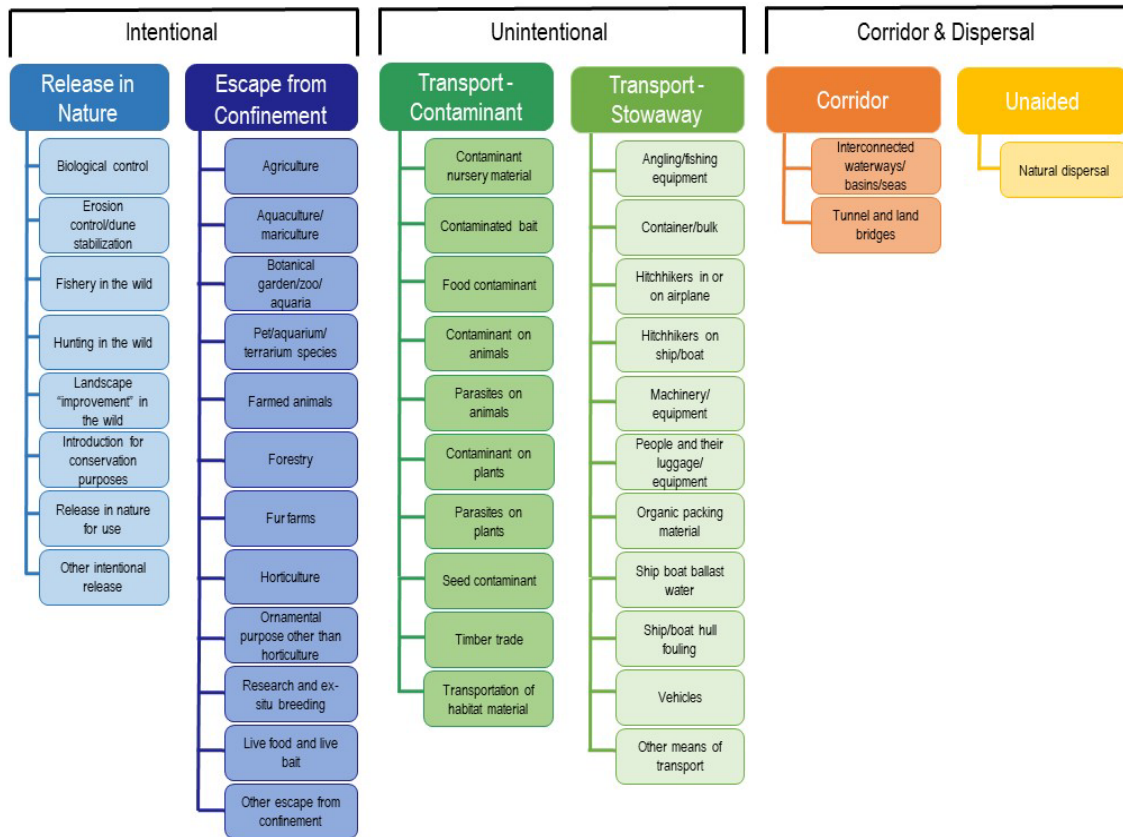

752

753 **Figure 2.** Overview of the hierarchical, standard categorisation of pathways. Six pathway  
 754 categories and 44 pathway subcategories are broadly categorised into a) intentional transport  
 755 and introduction of taxa, b) pathways of unintentional introduction and c) pathways by which  
 756 taxa move to new regions, without direct transportation by humans (i.e. Pathway types).

757 Adapted from Harrower et al. (2017).

758

759

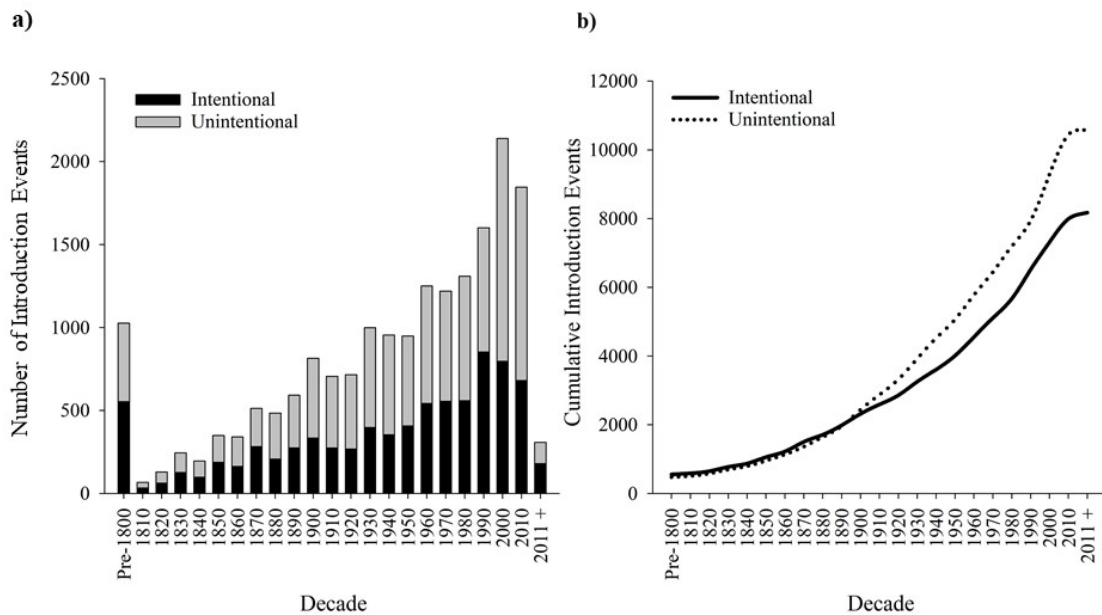

760

761 **Figure 3.** Decadal changes in the documented number of intentional and unintentional  
762 introductions of alien species for 101 countries. Trends in introduction events (n = 18746)  
763 involving over 4800 alien species are shown as: a) number of documented introduction  
764 events, and b) the cumulative number of documented introduction events. An introduction  
765 event in this figure represents one species introduced outside of its known native range for  
766 the first time and into one of the 101 countries in the pool.

767



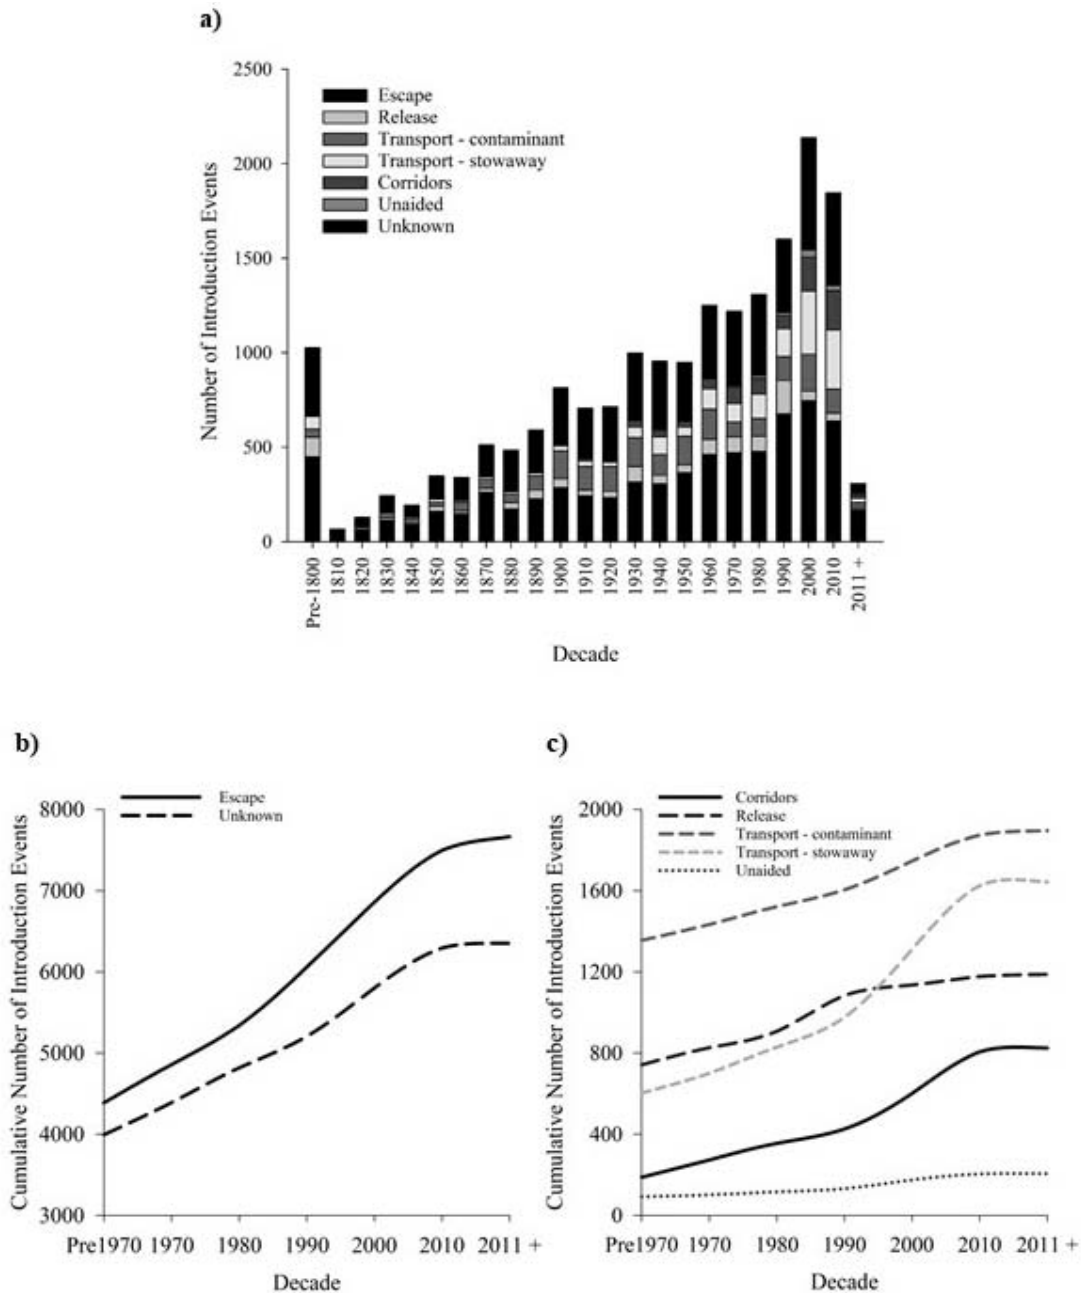

768

769 **Figure 4.** Changes in the six main pathway categories (as well as the number of introductions  
 770 via unknown pathways). (a) The documented number of introduction events ( $n = 18746$ ) of  
 771 alien species per decade since 1800 for 101 countries. (b-c) Cumulative number of  
 772 documented introduction events by pathway since 1970 (note different scaling on y-axes).

773

774

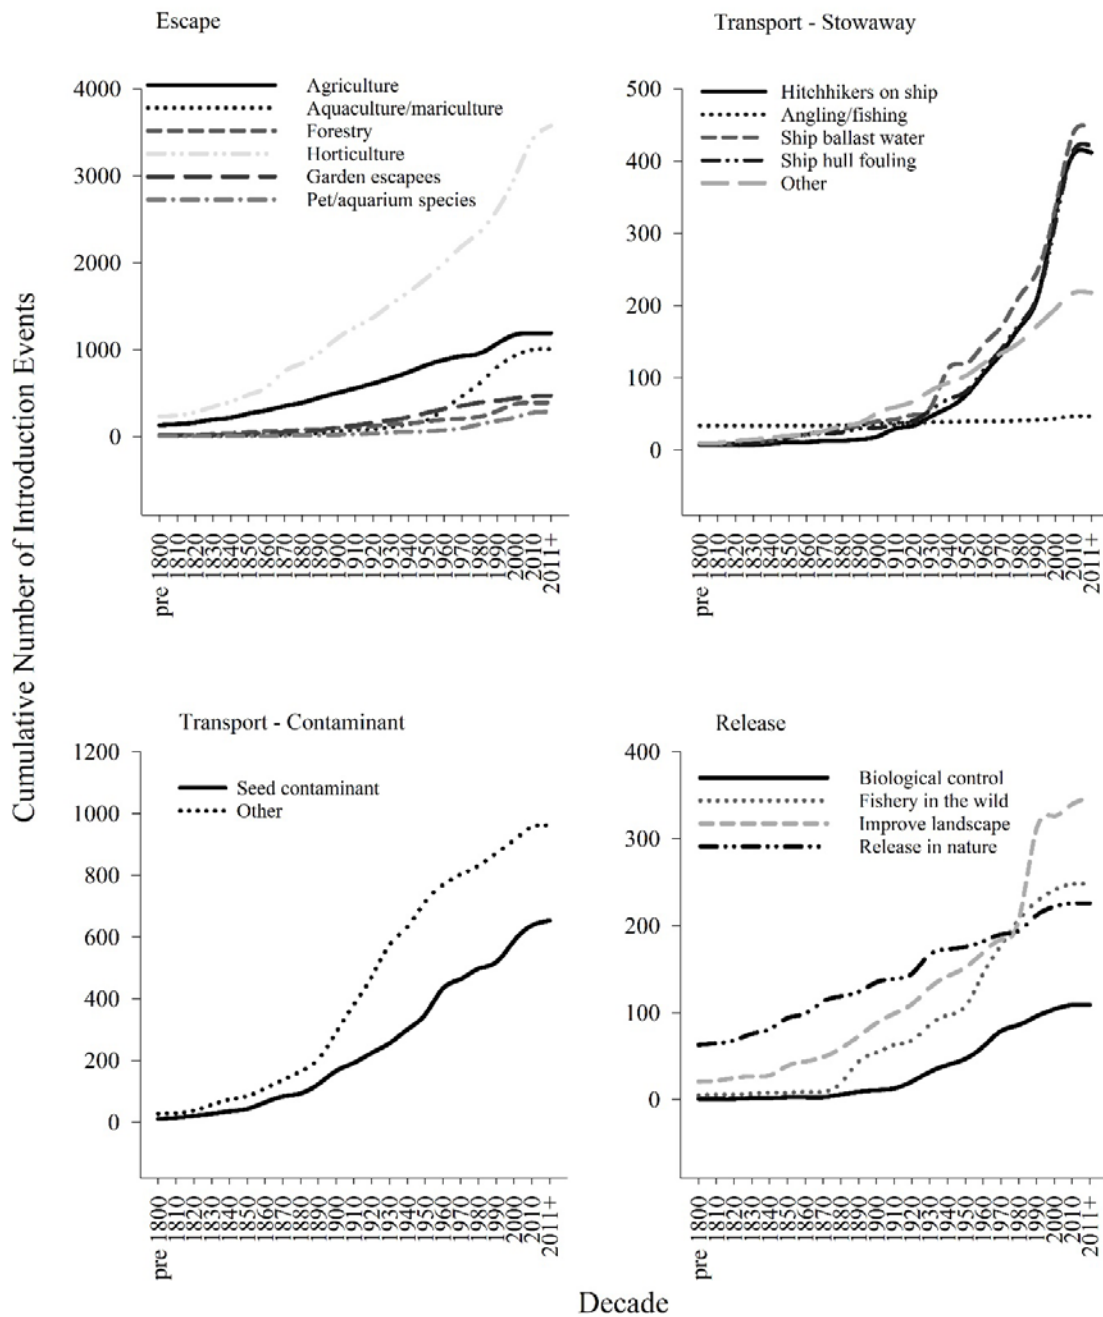

775

776 **Figure 5.** Changes in the dominant pathway subcategories across decades. Cumulative  
777 number of documented introduction events (note different scales on y-axes). The 18 pathway  
778 subcategories shown are those with most (> 100) introduction events (see Figure S1 for  
779 Corridors: interconnected waterways/basins/seas', 'unaided: natural dispersal across borders'  
780 and 'unknown' pathway subcategories not shown).
